# Supplementary material
Source: PubMed Central journal article supplement (PMC2491379)
Supplement: JCI0832709sd.pdf [file JCI0832709sd.pdf]

### S1

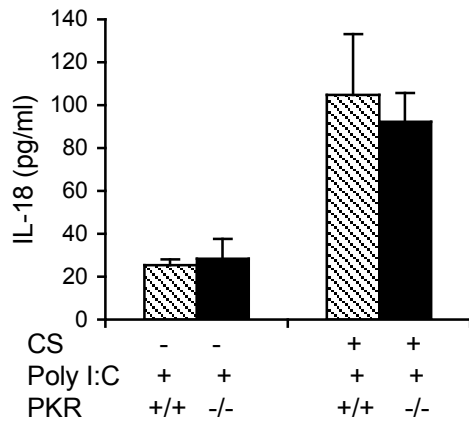

S1. Role of PKR in CS plus Poly (I:C)-induced IL-18 production. WT (+/+) mice and mice with null mutations (-/-) of PKR were exposed to CS(+) or RA (-) for 2 weeks and then given 4 doses of Poly(I:C) (50  $\mu$ g) or vehicle control. IL-18 expression in the BAL was evaluated by ELISA.

## S2

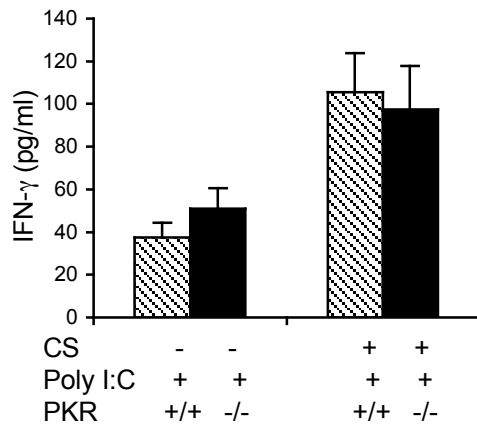

S2. Role of PKR in CS plus Poly (I:C)-induced IFN- $\gamma$  production. WT (+/+) mice and mice with null mutations (-/-) of PKR were exposed to CS(+) or RA (-) for 2 weeks and then given 4 doses of Poly(I:C) (50  $\mu$ g) or vehicle control. IFN- $\gamma$  expression in the BAL was evaluated by ELISA.

### S3

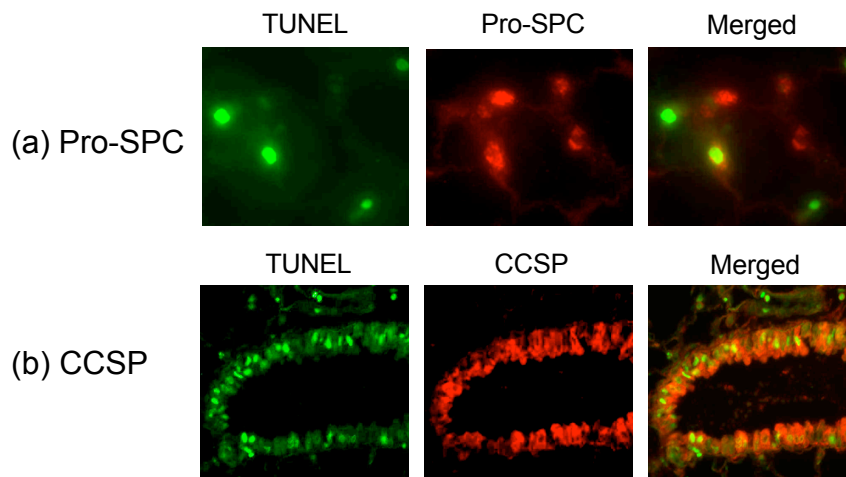

S3. Localization of TUNEL positive cells in the alveolar and airway epithelial cells. Double labeled IHC was performed using TUNEL stains detected by anti-flourescein antibody (green color) and Alexa 594 labeled anti-Pro-SPC (for alveolar epithelial cells) or anti-CCSP (for airway epithelial cells) antibodies (red color). Double positive cells have a yellow color.
